# Supplementary material for: Is N-acetyl-d-glucosamine a rigid 4C1 chair?
Source: PubMed Central journal article supplement — Glycobiology. 2011 Aug 1;21(12):1651–62. doi: 10.1093/glycob/cwr101 (PMC3219419; doi:10.1093/glycob/cwr101), 2011-08-01

**S1: Cremer-Pople analysis for the twenty 10  $\mu$ s explicit solvent molecular dynamics simulations.**

For each simulation, the puckering parameters  $Q$  and  $\theta$  are plotted against simulation time,  $\theta$  and  $\varphi$  are plotted against each other and  $\cos\langle\theta\rangle$  is plotted against simulation time (reports convergence of conformation).

**Key:**

pages 2-41:  $\alpha$ -anomers (1-OH), denoted alpha-D-X

pages 42-81: 1-O-methyl glycosides

-1C4 postfix:<sup>1</sup>C<sub>4</sub>-initiated simulations, otherwise <sup>4</sup>C<sub>1</sub>-

alpha-D-GlcNAc-1C4

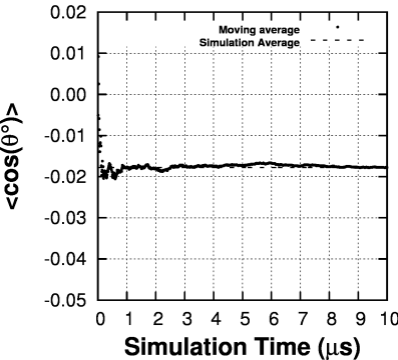

# alpha-D-GlcNAc

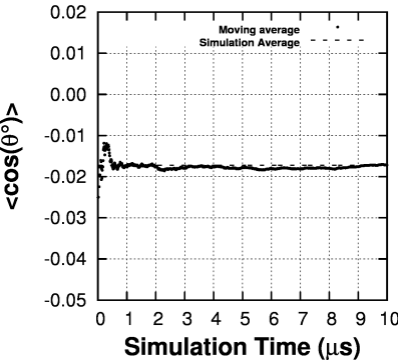

# alpha-D-GlcNS-1C4

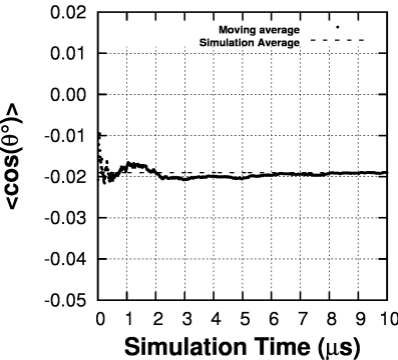

# alpha-D-GlcNS3S-1C4

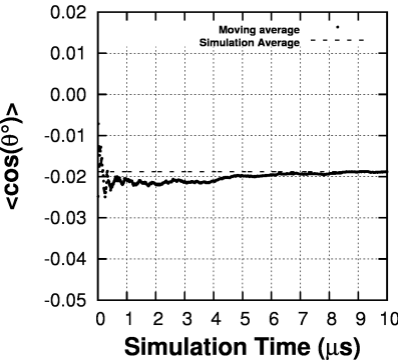

# alpha-D-GlcNS3S

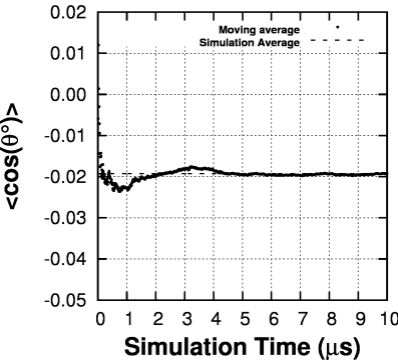

alpha-D-GlcNS6S-1C4

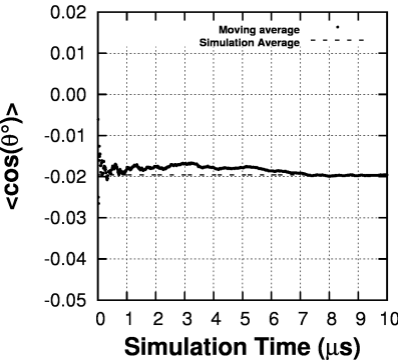

alpha-D-GlcNS6S3S-1C4

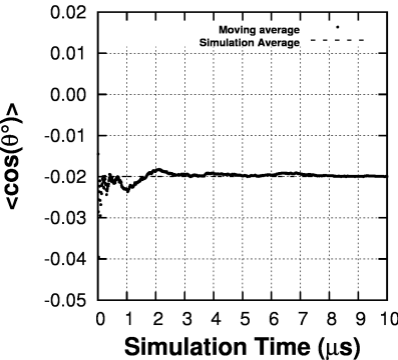



# alpha-D-GlcNS6S3S

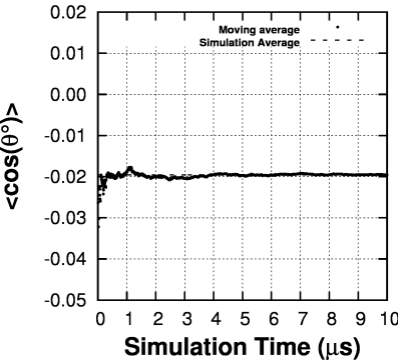

alpha-D-GlcNS6S

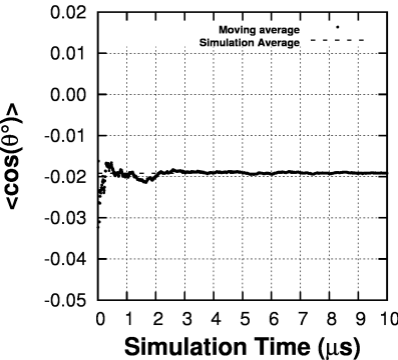

# alpha-D-GlcNS

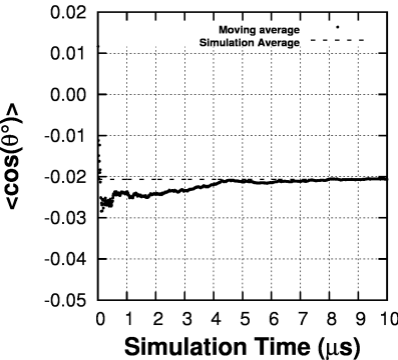

alpha-D-GlcNAc-1C4

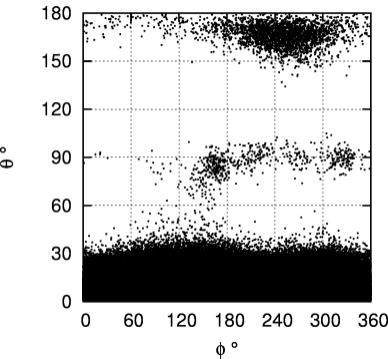

alpha-D-GlcNAc-1C4

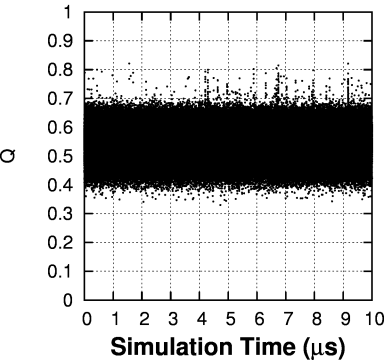

# alpha-D-GlcNAc-1C4

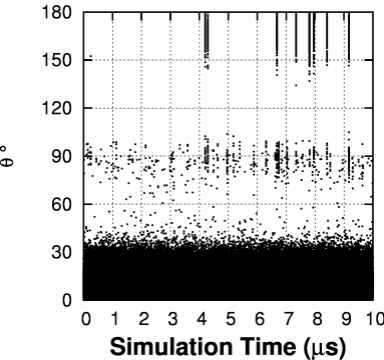

alpha-D-GlcNAc

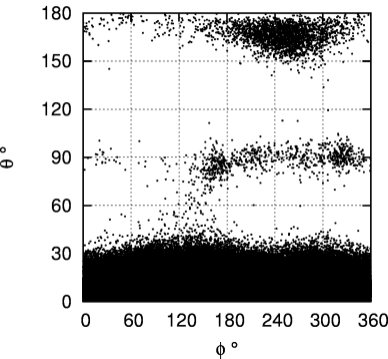

alpha-D-GlcNAc

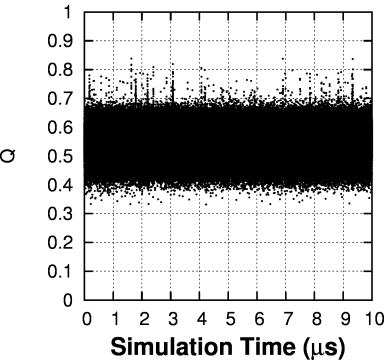



alpha-D-GlcNAc

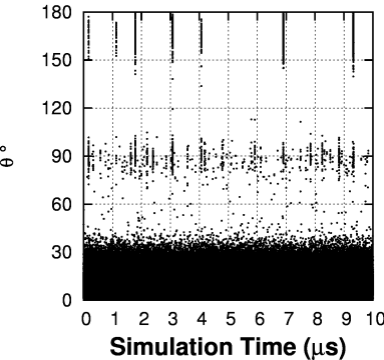

alpha-D-GlcNS-1C4

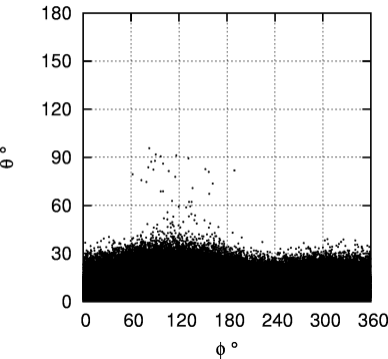

alpha-D-GlcNS-1C4

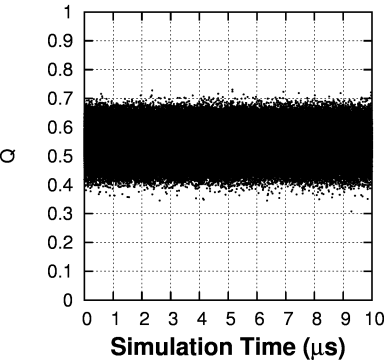

alpha-D-GlcNS-1C4

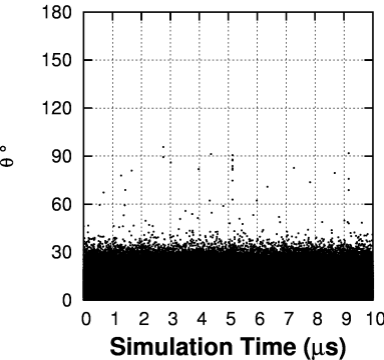

alpha-D-GlcNS3S-1C4

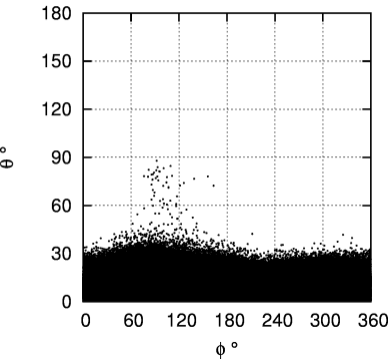

alpha-D-GlcNS3S-1C4

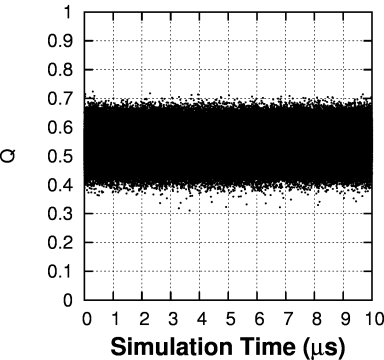

alpha-D-GlcNS3S-1C4

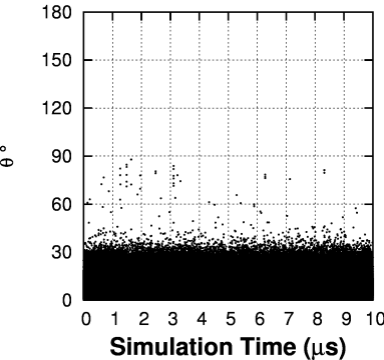

# alpha-D-GlcNS3S

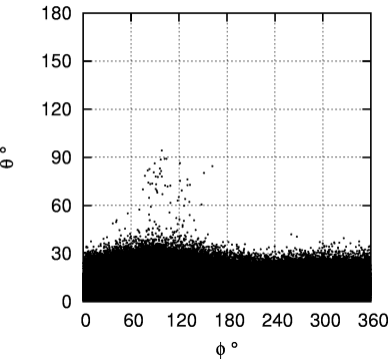



alpha-D-GlcNS3S

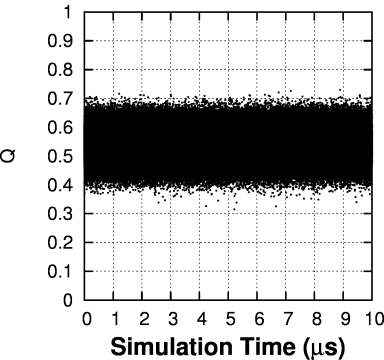

alpha-D-GlcNS3S

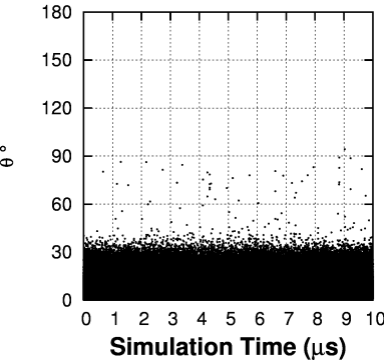

alpha-D-GlcNS6S-1C4

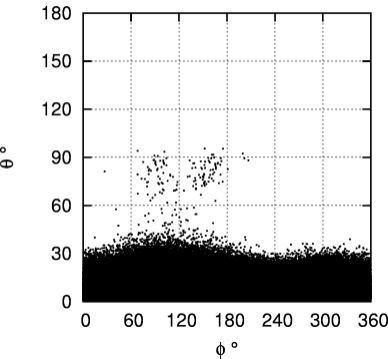

alpha-D-GlcNS6S-1C4

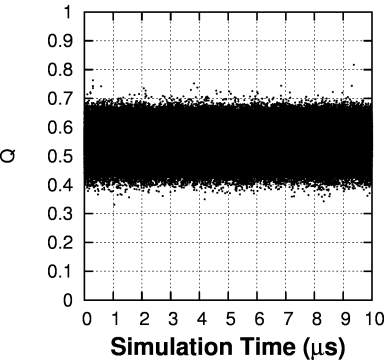

alpha-D-GlcNS6S-1C4

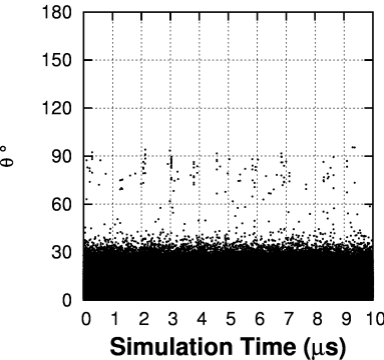

alpha-D-GlcNS6S3S-1C4

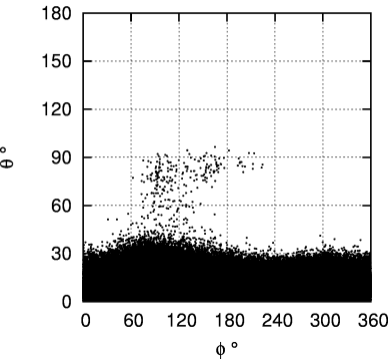

alpha-D-GlcNS6S3S-1C4

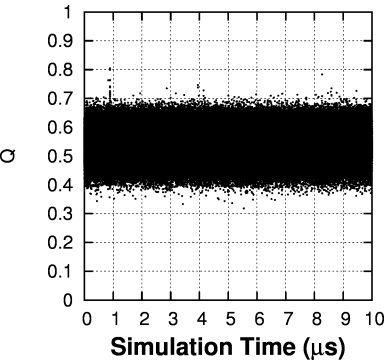

alpha-D-GlcNS6S3S-1C4

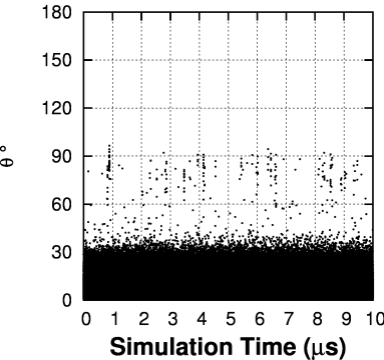



alpha-D-GlcNS6S3S

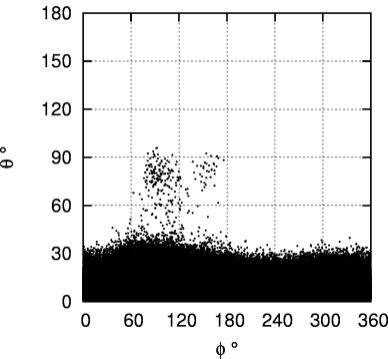

alpha-D-GlcNS6S3S

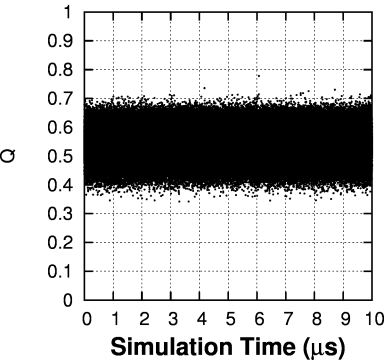

alpha-D-GlcNS6S3S

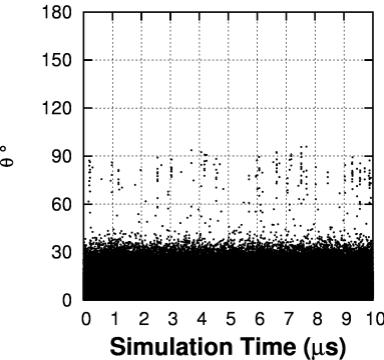

alpha-D-GlcNS6S

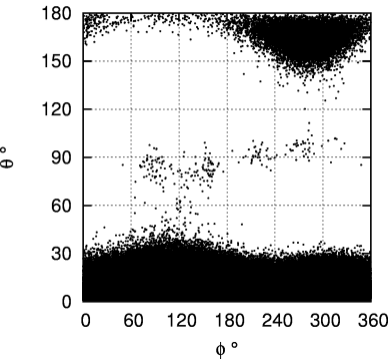

alpha-D-GlcNS6S

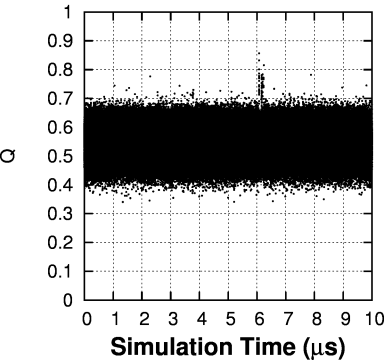

alpha-D-GlcNS6S

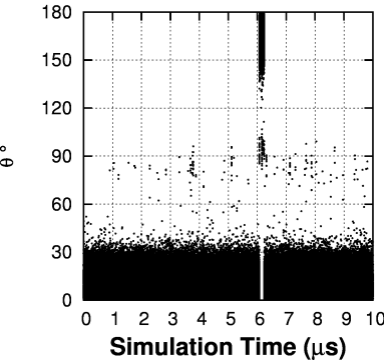

# alpha-D-GlcNS

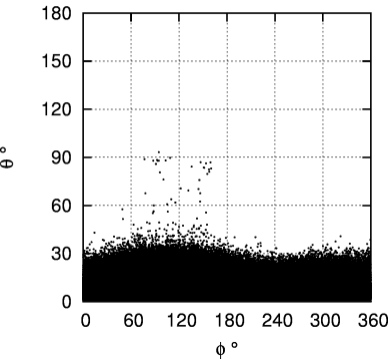

# alpha-D-GlcNS

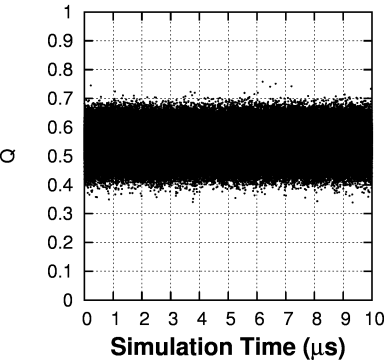



alpha-D-GlcNS

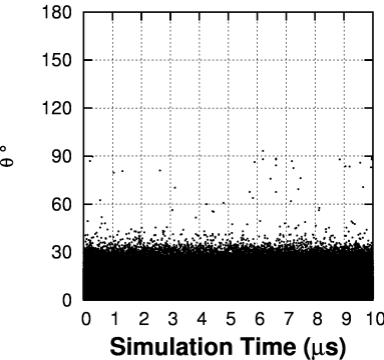

## glcNAc-1C4

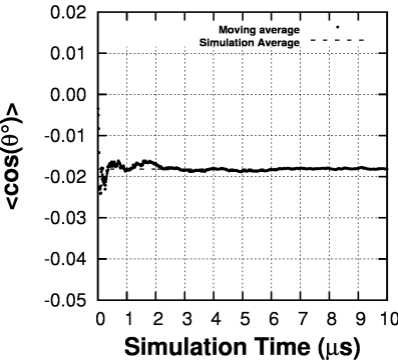

glcNAc

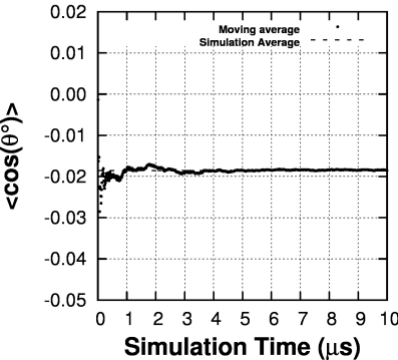

## glcNS-1C4

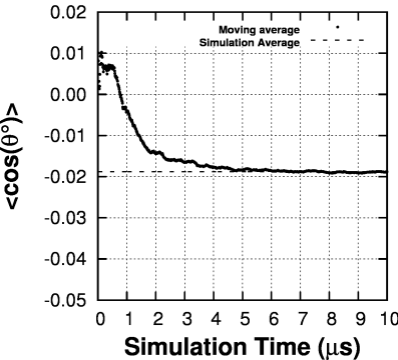

## glcNS3S-1C4

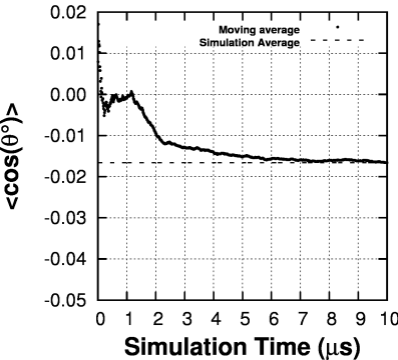

## glcNS3S

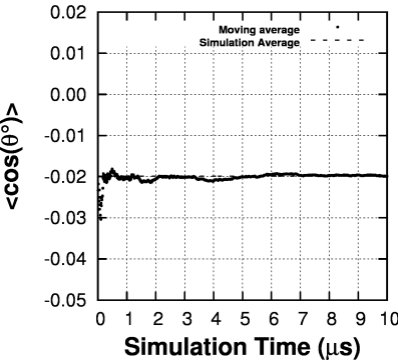

## glcNS6S-1C4

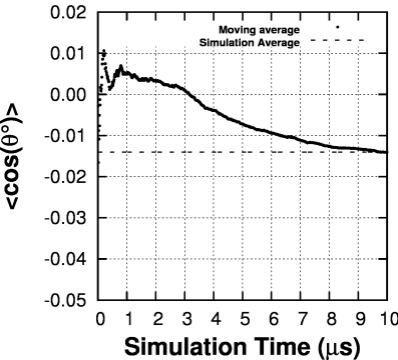

glcNS6S3S-1C4

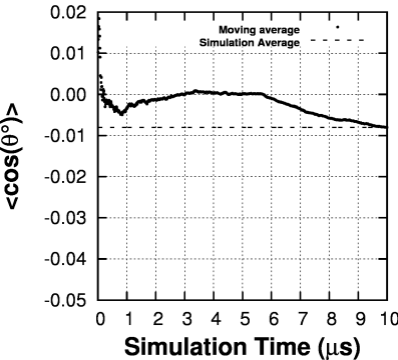



glcNS6S3S

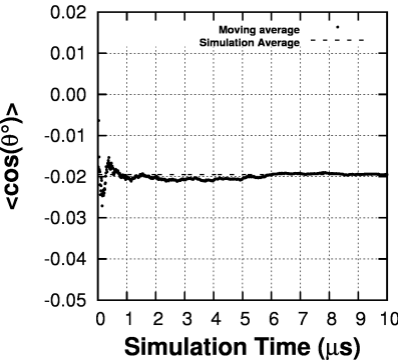

## glcNS6S

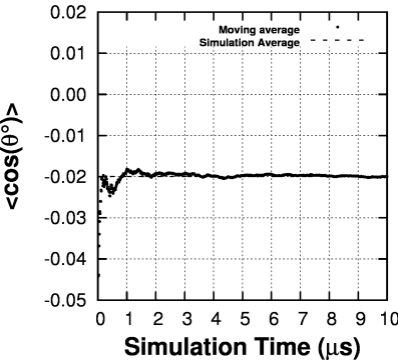

## glcNS

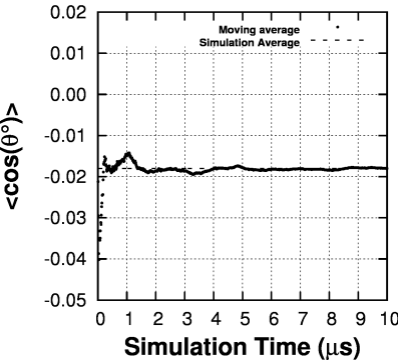

## glcNAc-1C4

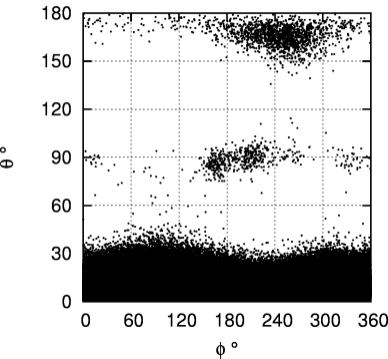

## glcNAc-1C4

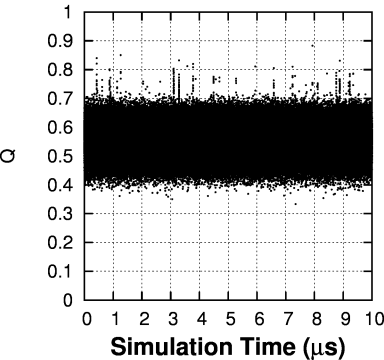

## glcNAc-1C4

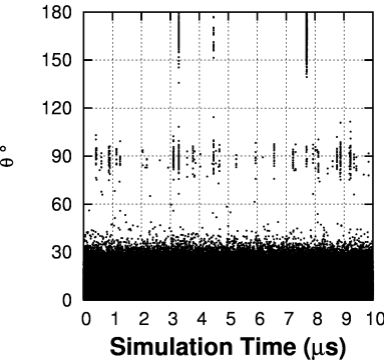

glcNAc

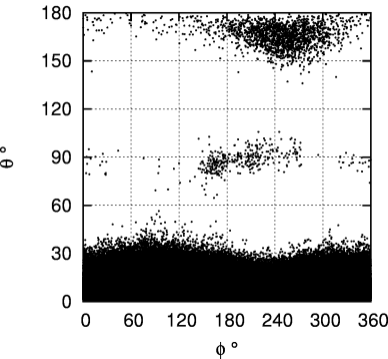

glcNAc

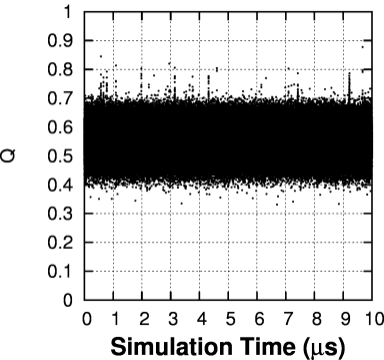



glcNAc

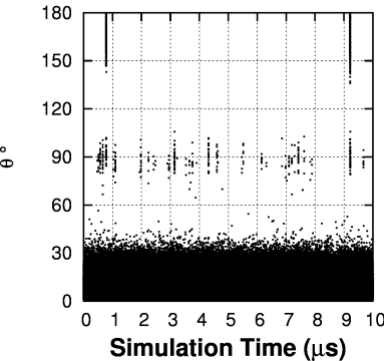

## glcNS-1C4

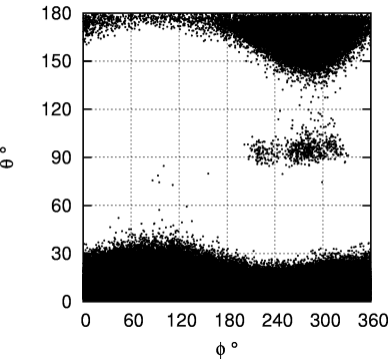

## glcNS-1C4

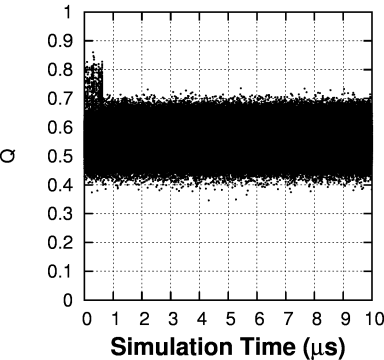

## glcNS-1C4

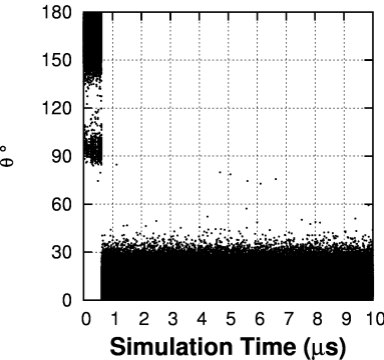

## glcNS3S-1C4

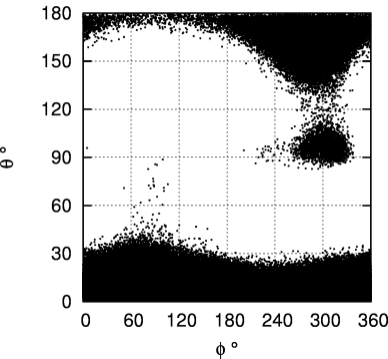

glcNS3S-1C4

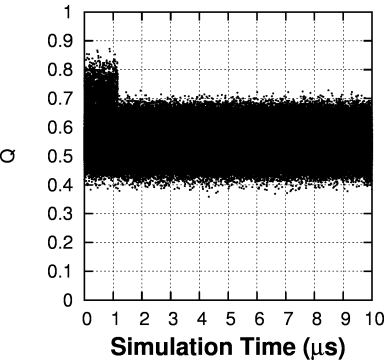

glcNS3S-1C4

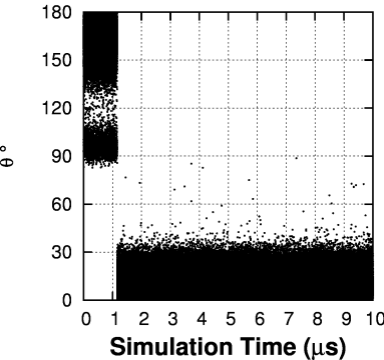

glcNS3S

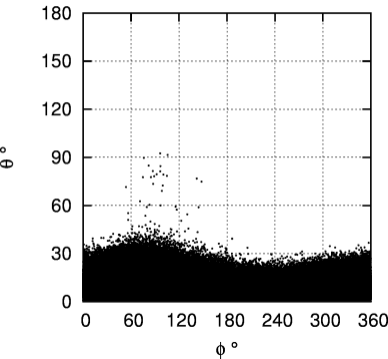



glcNS3S

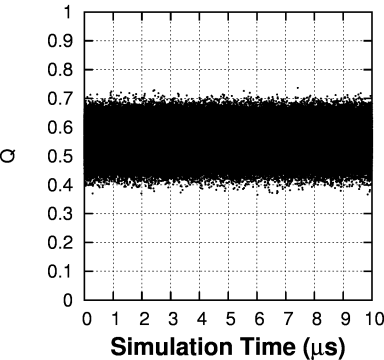

glcNS3S

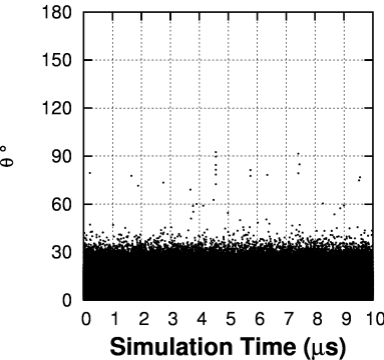

## glcNS6S-1C4

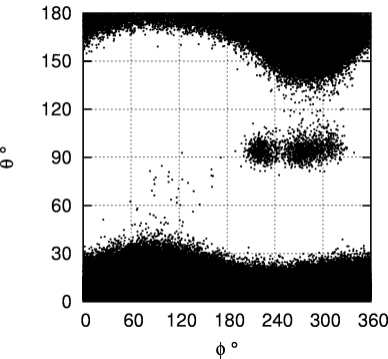

glcNS6S-1C4

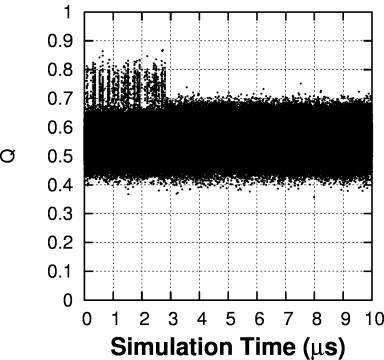

glcNS6S-1C4

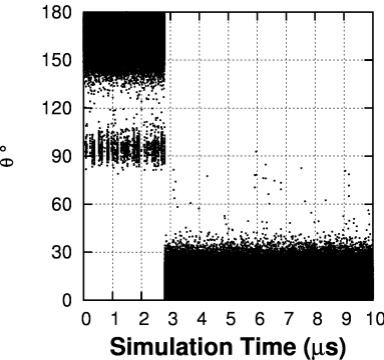

glcNS6S3S-1C4

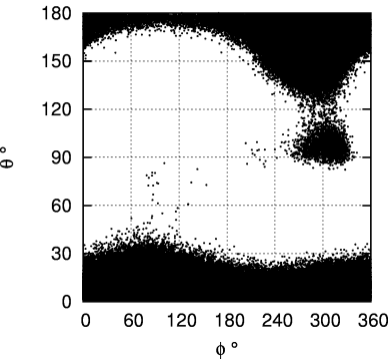

glcNS6S3S-1C4

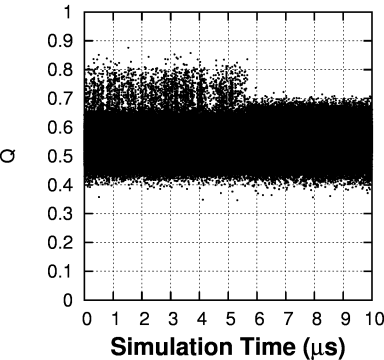

glcNS6S3S-1C4

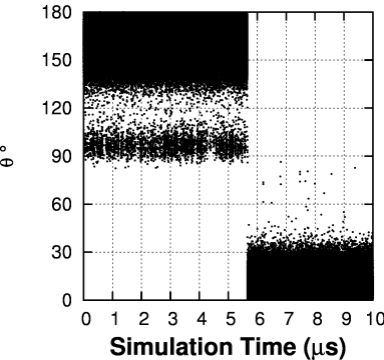



glcNS6S3S

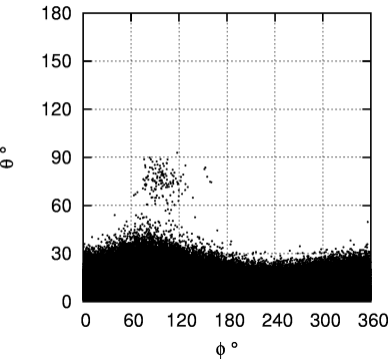

glcNS6S3S

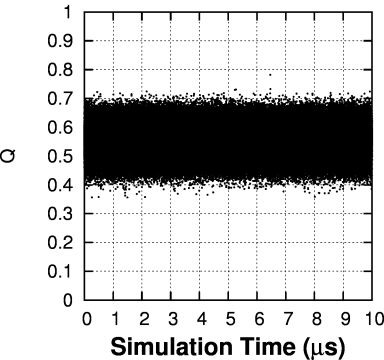

glcNS6S3S

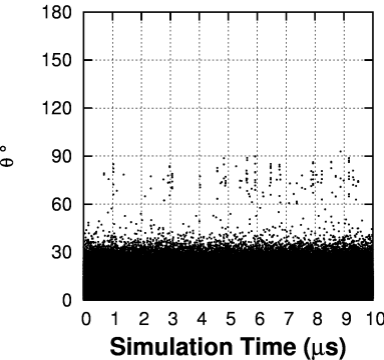

glcNS6S

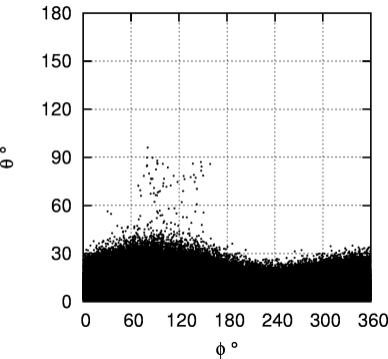

glcNS6S

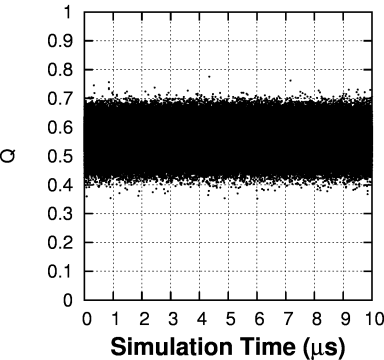

glcNS6S

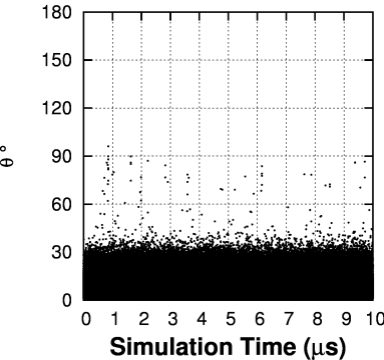

glcNS

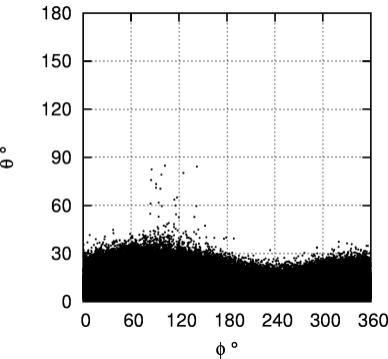

glcNS

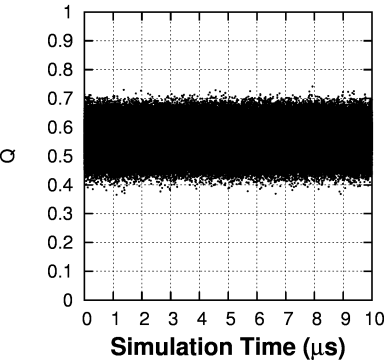



glcNS

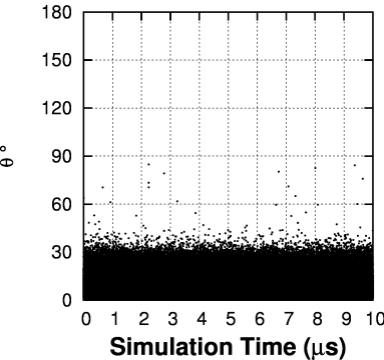

Supplement: supp_cwr101_cwr101supp_S1.pdf [file supp_cwr101_cwr101supp_S1.pdf]
