# Supplementary material for: Is N-acetyl-d-glucosamine a rigid 4C1 chair?
Source: PubMed Central journal article supplement — Glycobiology. 2011 Aug 1;21(12):1651–62. doi: 10.1093/glycob/cwr101 (PMC3219419; doi:10.1093/glycob/cwr101), 2011-08-01
Supplement: supp_cwr101_cwr101supp_S2.pdf [file supp_cwr101_cwr101supp_S2.pdf]

## S2: Analysis of the simulations

### Average Cremer-Pople parameters for each 10 $\mu$ s simulation

Key: "alpha-D"=1-OH (else 1-OMe) <sup>1</sup>C<sub>4</sub>=<sup>1</sup>C<sub>4</sub>-initiated (else <sup>4</sup>C<sub>1</sub>-initiated)

#### Cremer-Pople $\theta$

| <sup>4</sup> C <sub>1</sub> conformers ( $\theta < 60^\circ$ ) | AVE $\theta^\circ$ | SD   |
|----------------------------------------------------------------|--------------------|------|
| alpha-D-GlcNAc-1C4.ave                                         | 10.06              | 5.48 |
| alpha-D-GlcNAc.ave                                             | 10.05              | 5.48 |
| alpha-D-GlcNS-1C4.ave                                          | 9.46               | 5.16 |
| alpha-D-GlcNS3S-1C4.ave                                        | 9.55               | 5.20 |
| alpha-D-GlcNS3S.ave                                            | 9.52               | 5.18 |
| alpha-D-GlcNS6S-1C4.ave                                        | 9.50               | 5.20 |
| alpha-D-GlcNS6S3S-1C4.ave                                      | 9.62               | 5.26 |
| alpha-D-GlcNS6S3S.ave                                          | 9.63               | 5.27 |
| alpha-D-GlcNS6S.ave                                            | 9.50               | 5.20 |
| alpha-D-GlcNS.ave                                              | 9.46               | 5.15 |
| glcNAc-1C4.theta.ave                                           | 9.73               | 5.32 |
| glcNAc.theta.ave                                               | 9.70               | 5.30 |
| glcNS-1C4.theta.ave                                            | 9.47               | 5.19 |
| glcNS3S-1C4.theta.ave                                          | 9.65               | 5.30 |
| glcNS3S.theta.ave                                              | 9.66               | 5.30 |
| glcNS6S-1C4.theta.ave                                          | 9.46               | 5.24 |
| glcNS6S3S-1C4.theta.ave                                        | 9.68               | 5.37 |
| glcNS6S3S.theta.ave                                            | 9.65               | 5.36 |
| glcNS6S.theta.ave                                              | 9.45               | 5.24 |
| glcNS.theta.ave                                                | 9.47               | 5.19 |

  

| <sup>1</sup> C <sub>4</sub> conformers ( $\theta > 120^\circ$ ) | AVE $\theta^\circ$ | SD   |
|-----------------------------------------------------------------|--------------------|------|
| alpha-D-GlcNAc-1C4.ave                                          | 166.41             | 6.55 |
| alpha-D-GlcNAc.ave                                              | 166.26             | 6.39 |
| alpha-D-GlcNS6S.ave                                             | 164.88             | 6.54 |
| glcNAc-1C4.theta.ave                                            | 166.11             | 6.54 |
| glcNAc.theta.ave                                                | 165.91             | 7.95 |
| glcNS-1C4.theta.ave                                             | 164.90             | 6.28 |
| glcNS3S-1C4.theta.ave                                           | 163.39             | 7.23 |
| glcNS6S-1C4.theta.ave                                           | 165.13             | 6.29 |
| glcNS6S3S-1C4.theta.ave                                         | 162.53             | 7.52 |

Cremer-Pople Q

| <b><sup>4</sup>C<sub>1</sub> conformers (<math>\theta &lt; 60</math>)</b> | <b>AVE Q</b> | <b>SD</b> |
|---------------------------------------------------------------------------|--------------|-----------|
| data_4C1/alpha-D-GlcNAc-1C4.ave                                           | 0.54         | 0.04      |
| data_4C1/alpha-D-GlcNAc.ave                                               | 0.54         | 0.04      |
| data_4C1/alpha-D-GlcNS-1C4.ave                                            | 0.55         | 0.04      |
| data_4C1/alpha-D-GlcNS3S-1C4.ave                                          | 0.54         | 0.04      |
| data_4C1/alpha-D-GlcNS3S.ave                                              | 0.54         | 0.04      |
| data_4C1/alpha-D-GlcNS6S-1C4.ave                                          | 0.55         | 0.04      |
| data_4C1/alpha-D-GlcNS6S3S-1C4.ave                                        | 0.54         | 0.04      |
| data_4C1/alpha-D-GlcNS6S3S.ave                                            | 0.54         | 0.04      |
| data_4C1/alpha-D-GlcNS6S.ave                                              | 0.55         | 0.04      |
| data_4C1/alpha-D-GlcNS.ave                                                | 0.55         | 0.04      |
| data_4C1/glcNAc-1C4.q.ave                                                 | 0.56         | 0.04      |
| data_4C1/glcNAc.q.ave                                                     | 0.56         | 0.04      |
| data_4C1/glcNS-1C4.q.ave                                                  | 0.56         | 0.04      |
| data_4C1/glcNS3S-1C4.q.ave                                                | 0.56         | 0.04      |
| data_4C1/glcNS3S.q.ave                                                    | 0.56         | 0.04      |
| data_4C1/glcNS6S-1C4.q.ave                                                | 0.56         | 0.04      |
| data_4C1/glcNS6S3S-1C4.q.ave                                              | 0.56         | 0.04      |
| data_4C1/glcNS6S3S.q.ave                                                  | 0.56         | 0.04      |
| data_4C1/glcNS6S.q.ave                                                    | 0.56         | 0.04      |
| data_4C1/glcNS.q.ave                                                      | 0.56         | 0.04      |

| <b><sup>1</sup>C<sub>4</sub> conformers (<math>\theta &gt; 120</math>)</b> | <b>AVE Q</b> | <b>SD</b> |
|----------------------------------------------------------------------------|--------------|-----------|
| data_1C4/alpha-D-GlcNAc-1C4.ave                                            | 0.52         | 0.04      |
| data_1C4/alpha-D-GlcNAc.ave                                                | 0.52         | 0.04      |
| data_1C4/alpha-D-GlcNS-1C4.ave                                             | 0.48         | 0.00      |
| data_1C4/alpha-D-GlcNS3S-1C4.ave                                           | 0.53         | 0.05      |
| data_1C4/alpha-D-GlcNS6S.ave                                               | 0.55         | 0.04      |
| data_1C4/alpha-D-GlcNS.ave                                                 | 0.54         | 0.00      |
| data_1C4/glcNAc-1C4.q.ave                                                  | 0.52         | 0.04      |
| data_1C4/glcNAc.q.ave                                                      | 0.52         | 0.04      |
| data_1C4/glcNS-1C4.q.ave                                                   | 0.55         | 0.04      |
| data_1C4/glcNS3S-1C4.q.ave                                                 | 0.55         | 0.04      |
| data_1C4/glcNS6S-1C4.q.ave                                                 | 0.55         | 0.04      |
| data_1C4/glcNS6S3S-1C4.q.ave                                               | 0.55         | 0.04      |
| data_1C4/glcNS.q.ave                                                       | 0.56         | 0.00      |

### Populations of hydroxyl orientation

| Hexosamine  | Hydroxyl | conformation | % occupancy |
|-------------|----------|--------------|-------------|
| glcNAc-ome  | OH4.dat  | <i>t</i>     | 78.59       |
| glcNAc-ome  | OH4.dat  | <i>+g</i>    | 11.86       |
| glcNAc-ome  | OH4.dat  | <i>-g</i>    | 9.55        |
| glcNAc-ome  | OHM.dat  | <i>t</i>     | 62.30       |
| glcNAc-ome  | OHM.dat  | <i>+g</i>    | 22.02       |
| glcNAc-ome  | OHM.dat  | <i>-g</i>    | 15.69       |
| glcNAc-ome  | OH3.dat  | <i>t</i>     | 60.41       |
| glcNAc-ome  | OH3.dat  | <i>+g</i>    | 25.00       |
| glcNAc-ome  | OH3.dat  | <i>-g</i>    | 14.59       |
| glcNAc-roh  | OH1.dat  | <i>t</i>     | 68.84       |
| glcNAc-roh  | OH1.dat  | <i>+g</i>    | 19.08       |
| glcNAc-roh  | OH1.dat  | <i>-g</i>    | 12.08       |
| glcNAc-roh  | OH4.dat  | <i>t</i>     | 70.97       |
| glcNAc-roh  | OH4.dat  | <i>+g</i>    | 17.56       |
| glcNAc-roh  | OH4.dat  | <i>-g</i>    | 11.47       |
| glcNAc-roh  | OHM.dat  | <i>t</i>     | 66.53       |
| glcNAc-roh  | OHM.dat  | <i>+g</i>    | 20.22       |
| glcNAc-roh  | OHM.dat  | <i>-g</i>    | 13.26       |
| glcNAc-roh  | OH3.dat  | <i>t</i>     | 65.41       |
| glcNAc-roh  | OH3.dat  | <i>+g</i>    | 21.41       |
| glcNAc-roh  | OH3.dat  | <i>-g</i>    | 13.18       |
| glcNS-roh   | OH1.dat  | <i>t</i>     | 67.95       |
| glcNS-roh   | OH1.dat  | <i>+g</i>    | 18.85       |
| glcNS-roh   | OH1.dat  | <i>-g</i>    | 13.21       |
| glcNS-roh   | OH4.dat  | <i>t</i>     | 69.00       |
| glcNS-roh   | OH4.dat  | <i>+g</i>    | 18.20       |
| glcNS-roh   | OH4.dat  | <i>-g</i>    | 12.80       |
| glcNS-roh   | OHM.dat  | <i>t</i>     | 66.38       |
| glcNS-roh   | OHM.dat  | <i>+g</i>    | 19.86       |
| glcNS-roh   | OHM.dat  | <i>-g</i>    | 13.76       |
| glcNS-roh   | OH3.dat  | <i>t</i>     | 64.71       |
| glcNS-roh   | OH3.dat  | <i>+g</i>    | 21.68       |
| glcNS-roh   | OH3.dat  | <i>-g</i>    | 13.62       |
| glcNS6S-roh | OH1.dat  | <i>t</i>     | 66.53       |
| glcNS6S-roh | OH1.dat  | <i>+g</i>    | 19.99       |
| glcNS6S-roh | OH1.dat  | <i>-g</i>    | 13.48       |
| glcNS6S-roh | OH4.dat  | <i>t</i>     | 66.28       |
| glcNS6S-roh | OH4.dat  | <i>+g</i>    | 19.50       |
| glcNS6S-roh | OH4.dat  | <i>-g</i>    | 14.22       |
| glcNS6S-roh | OH3.dat  | <i>t</i>     | 64.67       |
| glcNS6S-roh | OH3.dat  | <i>+g</i>    | 21.20       |
| glcNS6S-roh | OH3.dat  | <i>-g</i>    | 14.13       |
| glcNS3S-roh | OH1.dat  | <i>t</i>     | 66.09       |
| glcNS3S-roh | OH1.dat  | <i>+g</i>    | 19.85       |
| glcNS3S-roh | OH1.dat  | <i>-g</i>    | 14.07       |
| glcNS3S-roh | OH4.dat  | <i>t</i>     | 67.25       |

|               |         |    |       |
|---------------|---------|----|-------|
| glcNS3S-roh   | OH4.dat | +g | 19.22 |
| glcNS3S-roh   | OH4.dat | -g | 13.53 |
| glcNS3S-roh   | OHM.dat | t  | 65.79 |
| glcNS3S-roh   | OHM.dat | +g | 20.15 |
| glcNS3S-roh   | OHM.dat | -g | 14.06 |
| glcNS6S3S-roh | OH1.dat | t  | 66.98 |
| glcNS6S3S-roh | OH1.dat | +g | 19.09 |
| glcNS6S3S-roh | OH1.dat | -g | 13.93 |
| glcNS6S3S-roh | OH4.dat | t  | 67.44 |
| glcNS6S3S-roh | OH4.dat | +g | 18.63 |
| glcNS6S3S-roh | OH4.dat | -g | 13.93 |

**Populations of hydroxymethyl orientations (O6-C6-C5-O5)**

| Hexosamine    | orientation | % occupancy |
|---------------|-------------|-------------|
| glcNAc-ome    | +g          | 1.78        |
| glcNAc-ome    | gt          | 39.70       |
| glcNAc-ome    | gg          | 58.52       |
| glcNAc-roh    | +g          | 1.78        |
| glcNAc-roh    | gt          | 38.61       |
| glcNAc-roh    | gg          | 59.61       |
| glcNS-roh     | +g          | 1.79        |
| glcNS-roh     | gt          | 38.50       |
| glcNS-roh     | gg          | 59.70       |
| glcNS6S-roh   | +g          | 3.99        |
| glcNS6S-roh   | gt          | 35.15       |
| glcNS6S-roh   | gg          | 60.86       |
| glcNS3S-roh   | +g          | 3.54        |
| glcNS3S-roh   | gt          | 35.70       |
| glcNS3S-roh   | gg          | 60.76       |
| glcNS6S3S-roh | +g          | 4.44        |
| glcNS6S3S-roh | gt          | 34.19       |
| glcNS6S3S-roh | gg          | 61.37       |

**Conformer populations (from 20  $\mu$ s)**

| <b>Pucker</b> | <b>GlcNAc</b> | <b>1-OMe-GlcNAc</b> |
|---------------|---------------|---------------------|
| 4C1           | 99.6146%      | 99.7559%            |
| OE            | 0.0004%       | 0.0012%             |
| OH1           | 0.0012%       | 0.0020%             |
| E1            | 0.0031%       | 0.0047%             |
| 2H1           | 0.0065%       | 0.0105%             |
| 2E            | 0.0106%       | 0.0063%             |
| 2H3           | 0.0118%       | 0.0029%             |
| E3            | 0.0063%       | 0.0011%             |
| 4H3           | 0.0023%       | 0.0002%             |
| 4E            | 0.0018%       | 0.0001%             |
| 4H5           | 0.0027%       | 0.0007%             |
| E5            | 0.0042%       | 0.0015%             |
| OH5           | 0.0015%       | 0.0014%             |
| 3OB           | 0.0018%       | 0.0015%             |
| 3S1           | 0.0011%       | 0.0009%             |
| B14           | 0.0002%       | 0.0001%             |
| 5S1           | 0.0010%       | 0.0006%             |
| 25B           | 0.0010%       | 0.0003%             |
| 2SO           | 0.0121%       | 0.0068%             |
| B3O           | 0.0144%       | 0.0116%             |
| 1S3           | 0.0092%       | 0.0130%             |
| 14B           | 0.0049%       | 0.0040%             |
| 1S5           | 0.0070%       | 0.0026%             |
| B25           | 0.0069%       | 0.0002%             |
| OS2           | 0.0133%       | 0.0021%             |
| EO            | 0.0000%       | 0.0000%             |
| 1HO           | 0.0000%       | 0.0000%             |
| 1E            | 0.0000%       | 0.0000%             |
| 1H2           | 0.0000%       | 0.0000%             |
| E2            | 0.0000%       | 0.0000%             |
| 3H2           | 0.0000%       | 0.0000%             |
| 3E            | 0.0000%       | 0.0000%             |
| 3H4           | 0.0000%       | 0.0000%             |
| E4            | 0.0003%       | 0.0001%             |
| 5H4           | 0.0002%       | 0.0005%             |
| 5E            | 0.0002%       | 0.0000%             |
| 5HO           | 0.0000%       | 0.0000%             |
| 1C4           | 0.2586%       | 0.1661%             |

| <b>Pucker</b> | <b>GlcNS</b> | <b>GlcNS3S</b> | <b>GlcNS6S</b> | <b>GlcNS6S3S</b> |
|---------------|--------------|----------------|----------------|------------------|
| <b>4C1</b>    | 99.9729%     | 99.9729%       | 99.1278%       | 99.9445%         |
| <b>OE</b>     | 0.0002%      | 0.0002%        | 0.0001%        | 0.0001%          |
| <b>OH1</b>    | 0.0008%      | 0.0008%        | 0.0007%        | 0.0012%          |
| <b>E1</b>     | 0.0032%      | 0.0032%        | 0.0040%        | 0.0083%          |
| <b>2H1</b>    | 0.0064%      | 0.0064%        | 0.0100%        | 0.0146%          |
| <b>2E</b>     | 0.0078%      | 0.0078%        | 0.0108%        | 0.0104%          |
| <b>2H3</b>    | 0.0048%      | 0.0048%        | 0.0057%        | 0.0033%          |
| <b>E3</b>     | 0.0010%      | 0.0010%        | 0.0011%        | 0.0008%          |
| <b>4H3</b>    | 0.0003%      | 0.0003%        | 0.0002%        | 0.0002%          |
| <b>4E</b>     | 0.0000%      | 0.0000%        | 0.0000%        | 0.0000%          |
| <b>4H5</b>    | 0.0000%      | 0.0000%        | 0.0002%        | 0.0000%          |
| <b>E5</b>     | 0.0001%      | 0.0001%        | 0.0002%        | 0.0002%          |
| <b>OH5</b>    | 0.0003%      | 0.0003%        | 0.0000%        | 0.0001%          |
| <b>3OB</b>    | 0.0000%      | 0.0000%        | 0.0000%        | 0.0000%          |
| <b>3S1</b>    | 0.0000%      | 0.0000%        | 0.0000%        | 0.0000%          |
| <b>B14</b>    | 0.0001%      | 0.0001%        | 0.0005%        | 0.0001%          |
| <b>5S1</b>    | 0.0010%      | 0.0010%        | 0.0041%        | 0.0072%          |
| <b>25B</b>    | 0.0003%      | 0.0003%        | 0.0012%        | 0.0033%          |
| <b>2SO</b>    | 0.0007%      | 0.0007%        | 0.0050%        | 0.0034%          |
| <b>B3O</b>    | 0.0000%      | 0.0000%        | 0.0010%        | 0.0012%          |
| <b>1S3</b>    | 0.0000%      | 0.0000%        | 0.0013%        | 0.0006%          |
| <b>14B</b>    | 0.0000%      | 0.0000%        | 0.0005%        | 0.0000%          |
| <b>1S5</b>    | 0.0000%      | 0.0000%        | 0.0013%        | 0.0000%          |
| <b>B25</b>    | 0.0000%      | 0.0000%        | 0.0003%        | 0.0000%          |
| <b>OS2</b>    | 0.0000%      | 0.0000%        | 0.0002%        | 0.0000%          |
| <b>EO</b>     | 0.0000%      | 0.0000%        | 0.0000%        | 0.0000%          |
| <b>1HO</b>    | 0.0000%      | 0.0000%        | 0.0000%        | 0.0000%          |
| <b>1E</b>     | 0.0000%      | 0.0000%        | 0.0000%        | 0.0000%          |
| <b>1H2</b>    | 0.0000%      | 0.0000%        | 0.0000%        | 0.0000%          |
| <b>E2</b>     | 0.0000%      | 0.0000%        | 0.0000%        | 0.0000%          |
| <b>3H2</b>    | 0.0000%      | 0.0000%        | 0.0000%        | 0.0000%          |
| <b>3E</b>     | 0.0000%      | 0.0000%        | 0.0000%        | 0.0000%          |
| <b>3H4</b>    | 0.0000%      | 0.0000%        | 0.0001%        | 0.0000%          |
| <b>E4</b>     | 0.0000%      | 0.0000%        | 0.0003%        | 0.0000%          |
| <b>5H4</b>    | 0.0000%      | 0.0000%        | 0.0017%        | 0.0000%          |
| <b>5E</b>     | 0.0000%      | 0.0000%        | 0.0010%        | 0.0000%          |
| <b>5HO</b>    | 0.0000%      | 0.0000%        | 0.0003%        | 0.0000%          |
| <b>1C4</b>    | 0.0000%      | 0.0000%        | 0.8196%        | 0.0000%          |
