# Supplementary material for: Is N-acetyl-d-glucosamine a rigid 4C1 chair?
Source: PubMed Central journal article supplement — Glycobiology. 2011 Aug 1;21(12):1651–62. doi: 10.1093/glycob/cwr101 (PMC3219419; doi:10.1093/glycob/cwr101), 2011-08-01
Supplement: supp_cwr101_cwr101supp_S3.pdf [file supp_cwr101_cwr101supp_S3.pdf]

**S3: Chemical shift assignments (ppm) of  $^{13}\text{C}$  and  $^1\text{H}$  atoms in the five  $\alpha$ -anomer hexosamines**

| Hexosamine | Assignment | $^{13}\text{C}$ | $^1\text{H}$ |
|------------|------------|-----------------|--------------|
| GlcNAc     | C1-H1      | 93.579          | 5.194        |
| GlcNAc     | C2-H2      | 56.788          | 3.868        |
| GlcNAc     | C3-H3      | 73.374          | 3.754        |
| GlcNAc     | C4-H4      | 72.771          | 3.478        |
| GlcNAc     | C5-H5      | 74.247          | 3.847        |
| GlcNAc     | C6-H61     | 63.262          | 3.836        |
| GlcNAc     | C6-H62     | 63.253          | 3.786        |
| GlcNS      | C1-H1      | 94.060          | 5.434        |
| GlcNS      | C2-H2      | 60.750          | 3.205        |
| GlcNS      | C3-H3      | 73.778          | 3.608        |
| GlcNS      | C4-H4      | 72.783          | 3.463        |
| GlcNS      | C5-H5      | 73.982          | 3.823        |
| GlcNS      | C6-H61     | 63.319          | 3.762        |
| GlcNS      | C6-H62     | 63.317          | 3.831        |
| GlcNS6S    | C1-H1      | 94.109          | 5.431        |
| GlcNS6S    | C2-H2      | 60.607          | 3.225        |
| GlcNS6S    | C3-H3      | 73.694          | 3.613        |
| GlcNS6S    | C4-H4      | 72.456          | 3.515        |
| GlcNS6S    | C5-H5      | 72.141          | 4.019        |
| GlcNS6S    | C6-H61     | 69.912          | 4.248        |
| GlcNS6S    | C6-H62     | 69.912          | 4.248        |
| GlcNS6S3S  | C1-H1      | 94.313          | 5.451        |
| GlcNS6S3S  | C2-H2      | 59.419          | 3.370        |
| GlcNS6S3S  | C3-H3      | 81.050          | 4.382        |
| GlcNS6S3S  | C4-H4      | 71.130          | 3.691        |
| GlcNS6S3S  | C5-H5      | 72.174          | 4.099        |
| GlcNS6S3S  | C6-H61     | 69.788          | 4.270        |
| GlcNS6S3S  | C6-H62     | 69.788          | 4.270        |
| GlcNS3S    | C1-H1      | 94.237          | 5.439        |
| GlcNS3S    | C2-H2      | 59.485          | 3.333        |
| GlcNS3S    | C3-H3      | 81.258          | 4.364        |
| GlcNS3S    | C4-H4      | 71.398          | 3.634        |
| GlcNS3S    | C5-H5      | 73.987          | 3.882        |
| GlcNS3S    | C6-H61     | 63.169          | 3.821        |
| GlcNS3S    | C6-H62     | 63.163          | 3.793        |

Data were recorded with a  $^1\text{H}$  frequency of 600 MHz

## Description of chemical shifts

The C1 chemical shift in the sulfonated hexosamines was downfield of the corresponding value in GlcNAc by  $\approx 0.5$  ppm. Sulfonation at the N-position caused a downfield shift at C2 in the range 2.6 to 3.9 ppm and C3 experienced the largest downfield shift due to 3-O-sulfonation,  $\approx 8$  ppm, in the two 3-O-sulfonated hexosamines GlcNS3S and GlcNS6S3S. Carbon atoms C4 and C5 were shifted upfield (0.3 to 2.1 ppm) in the di-sulfonated hexosamines relative to the corresponding values in unsulfonated GlcNAc. In monosulfonated GlcNS the values of the chemical shifts of carbon atoms C4 and C5 were marginally perturbed downfield and upfield by 0.01 and 0.3 ppm, respectively. The magnitude of the perturbation in pyranose ring proton chemical shifts due to sulfonation was smaller than for the carbon atoms. The largest changes were seen for protons H2 and H3. In the N-sulfonated hexosamines the H2 chemical shift was  $\approx 0.5$  ppm upfield of the corresponding value in GlcNAc. In the 3-O-sulfonated hexosamines the H3 proton chemical shift was  $\approx 0.6$  Hz downfield of the GlcNAc value.
